# Supplementary material for: A universal cue for grammatical categories in the input to children: Frequent frames
Source: PubMed Central journal article supplement — Cognition. 2018 Jun;175:131–40. doi: 10.1016/j.cognition.2018.02.005 (PMC5894936; doi:10.1016/j.cognition.2018.02.005), 2018-06
Supplement: mmc1.pdf [file mmc1.pdf]

658 **5 Supplementary materials**

659 **5.1 Data**

660 Data and source code are available online.<sup>6</sup> Figure 1 shows the age range of each target child  
661 in each corpus in our language sample.

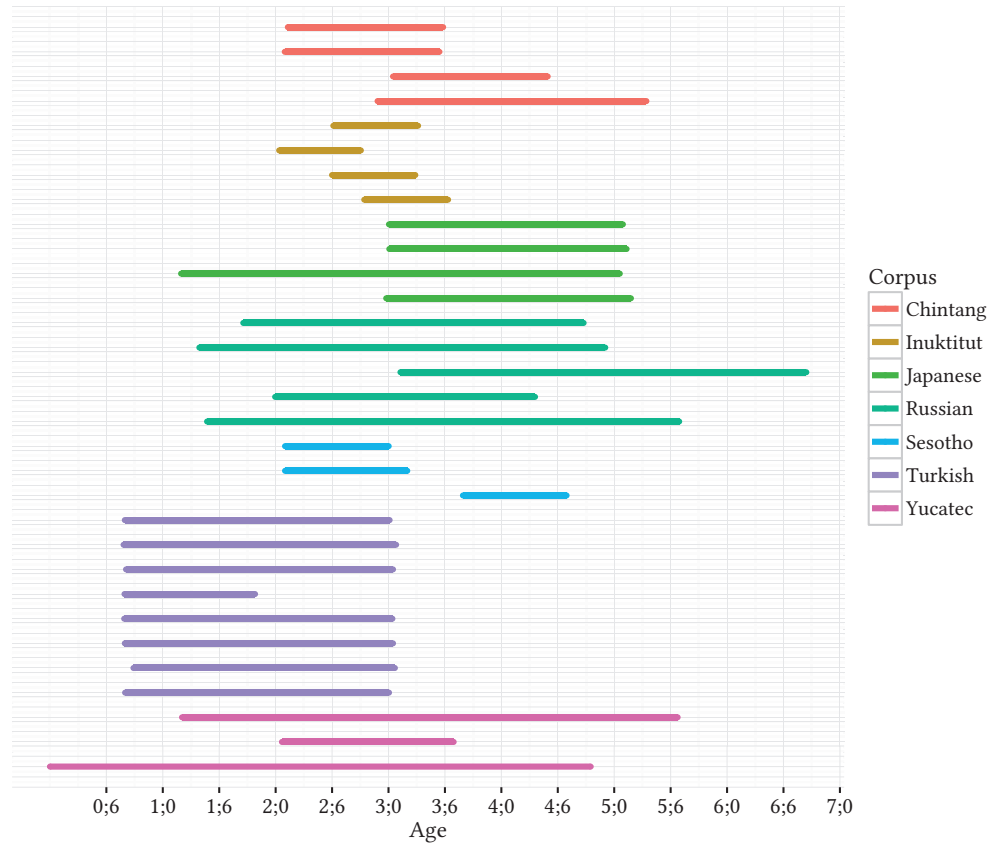

Figure 1: Age spans of children by corpus

<sup>6</sup><https://github.com/acqdiv/frequent-frames>

662 Table 14 lists the grammatical category abbreviations used in the corpora. The category Particle  
663 (PTCL) includes all non-inflecting, dependent forms that have not been marked as a preposition  
664 or postposition. Morphemes also include PFX (prefix) and SFX (suffix).

| Abbreviation | Category                   |
|--------------|----------------------------|
| ADJ          | Adjective                  |
| ADV          | Adverb                     |
| AUX          | Auxiliary                  |
| CONJ         | Conjunction                |
| INTJ         | Interjection               |
| N            | Noun                       |
| NUM          | Numeral                    |
| POST         | Postposition               |
| PREP         | Preposition                |
| PRODEM       | Pronominal / Demonstrative |
| PTCL         | Particle                   |
| V            | Verb                       |

Table 14: Grammatical categories

## 665 5.2 Operationalization

666 Figure 2 shows the distribution of frequent frames across the corpora On the x-axis are relative  
667 frequency ranges. The y-axis shows the number of frames in each bin.

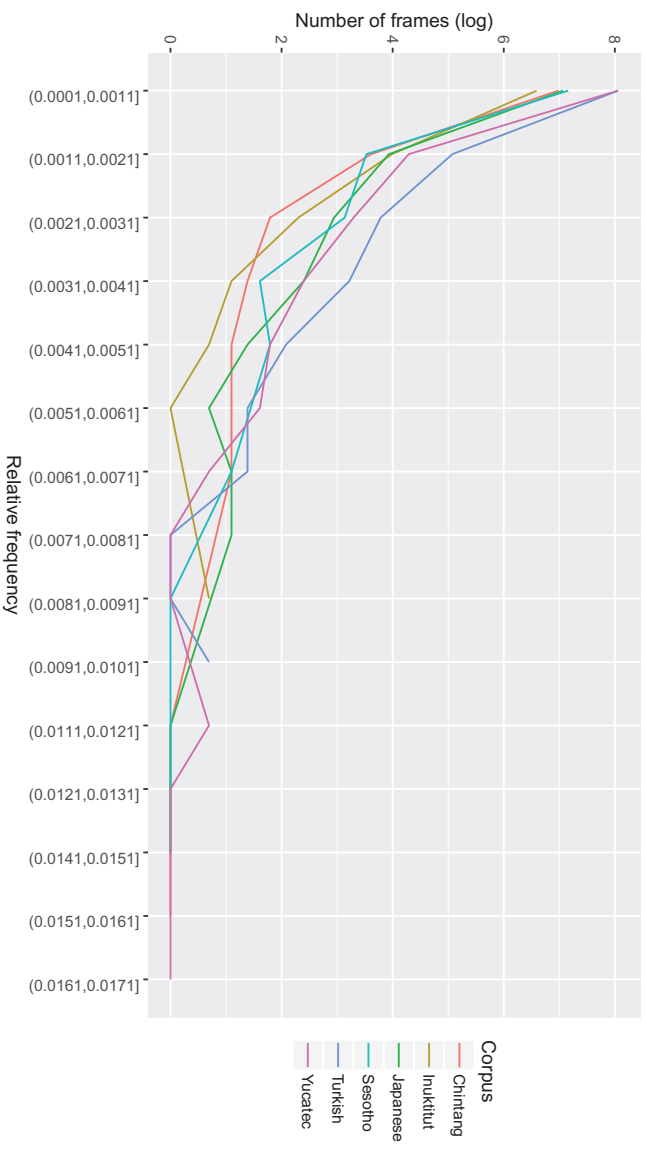

Figure 2: Distribution of most frequent morpheme frames

668 **5.3 Analysis: individual children**

669 Figures 3 and 4 show that frequent word frames in child-surrounding speech to individual  
670 children are not accurate or complete predictors of the intervening target word of the frame  
671 in Chintang and Russian. There are a few very accurate and often repeated frames (the large  
672 dots), but frame-based categories in general show no pattern.

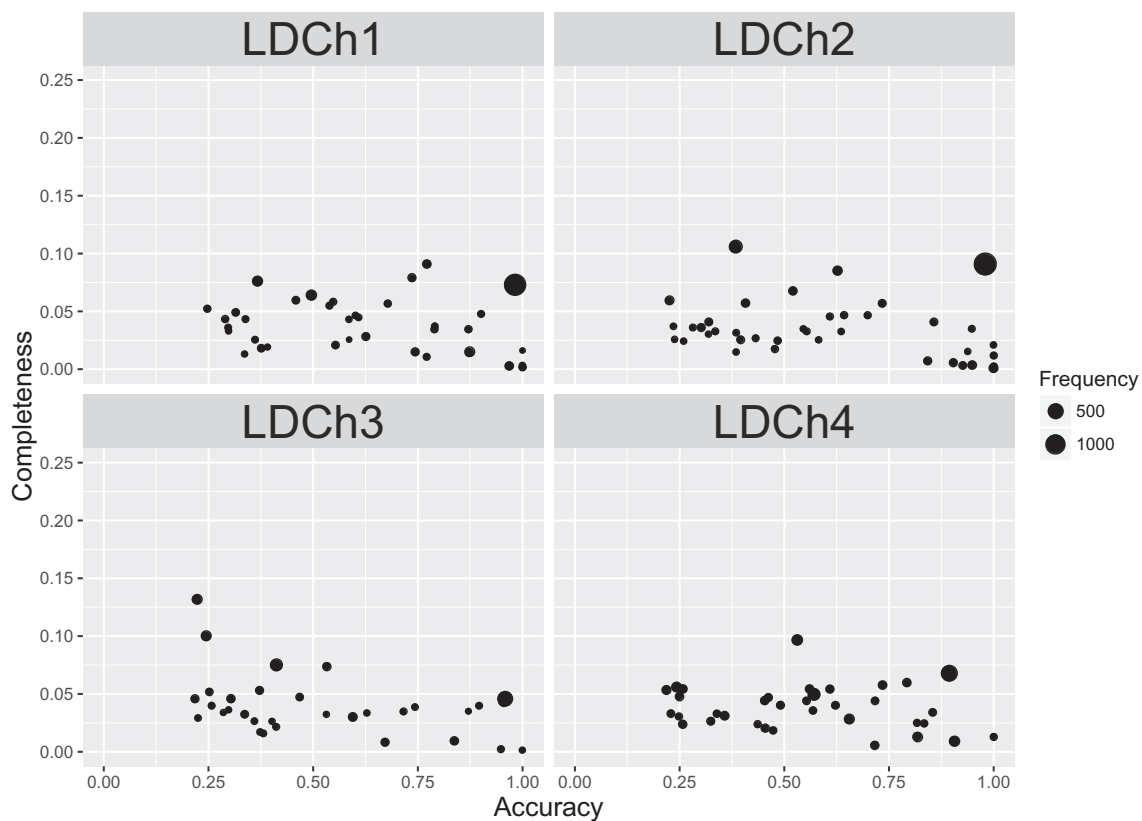

Figure 3: Accuracy and completeness: word frames to individual children in Chintang

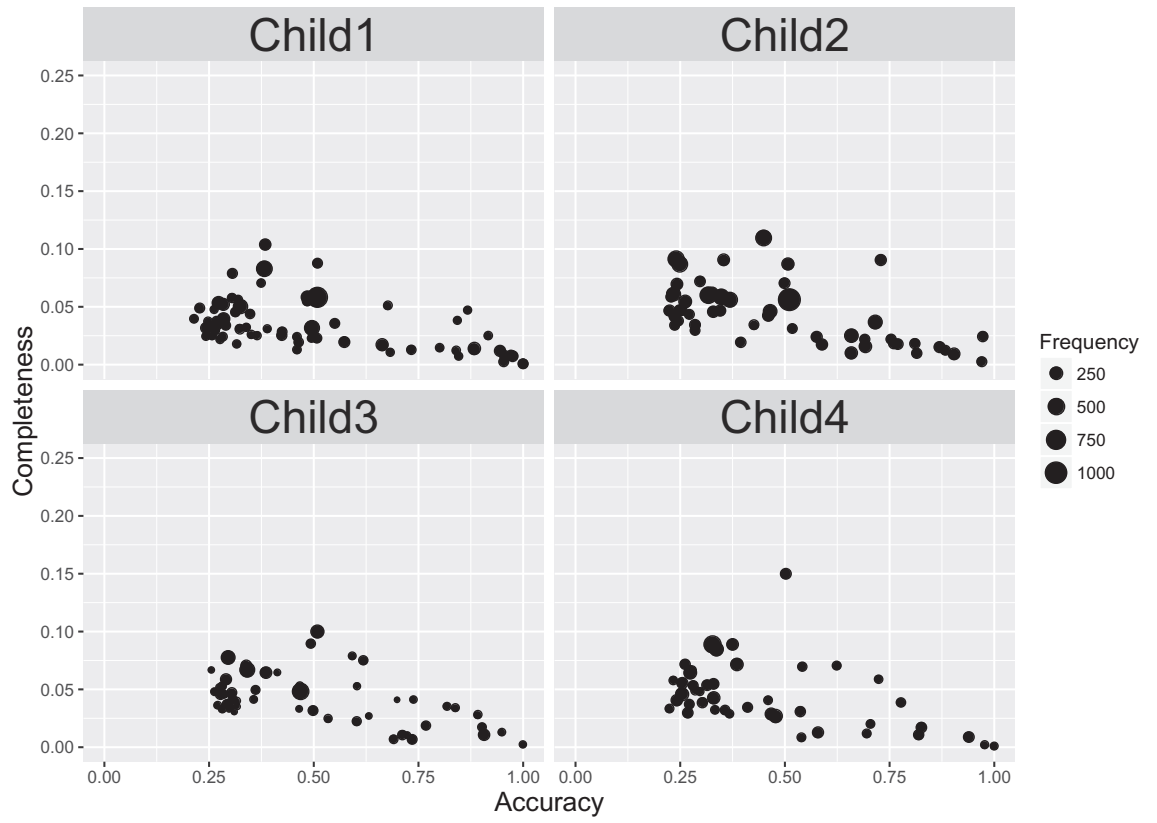

Figure 4: Accuracy and completeness: word frames to individual children in Russian

673 Figure 5 shows accuracy and completeness of frequent morpheme frames at the level of  
674 individual children in Chintang. There is a clear pattern shown: the majority of frames are  
675 very accurate and completeness scores are higher than in corresponding word frames.

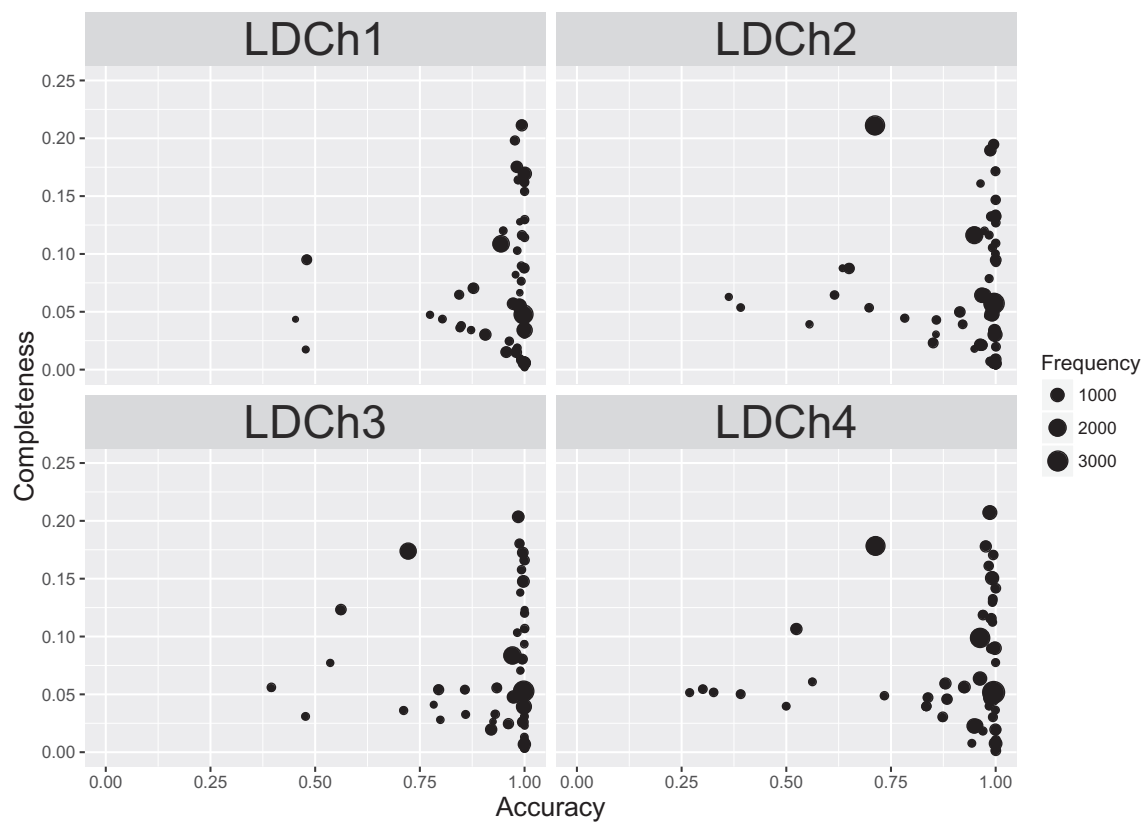

Figure 5: Accuracy and completeness: morpheme frames to individual children in Chintang

676 5.4 Analysis: frequent frames

677 Figure 6 shows the accuracy and completeness of word frames (relative frequency threshold)  
678 across pooled child-surrounding speech in each corpus. There is no discernible pattern across  
679 languages.

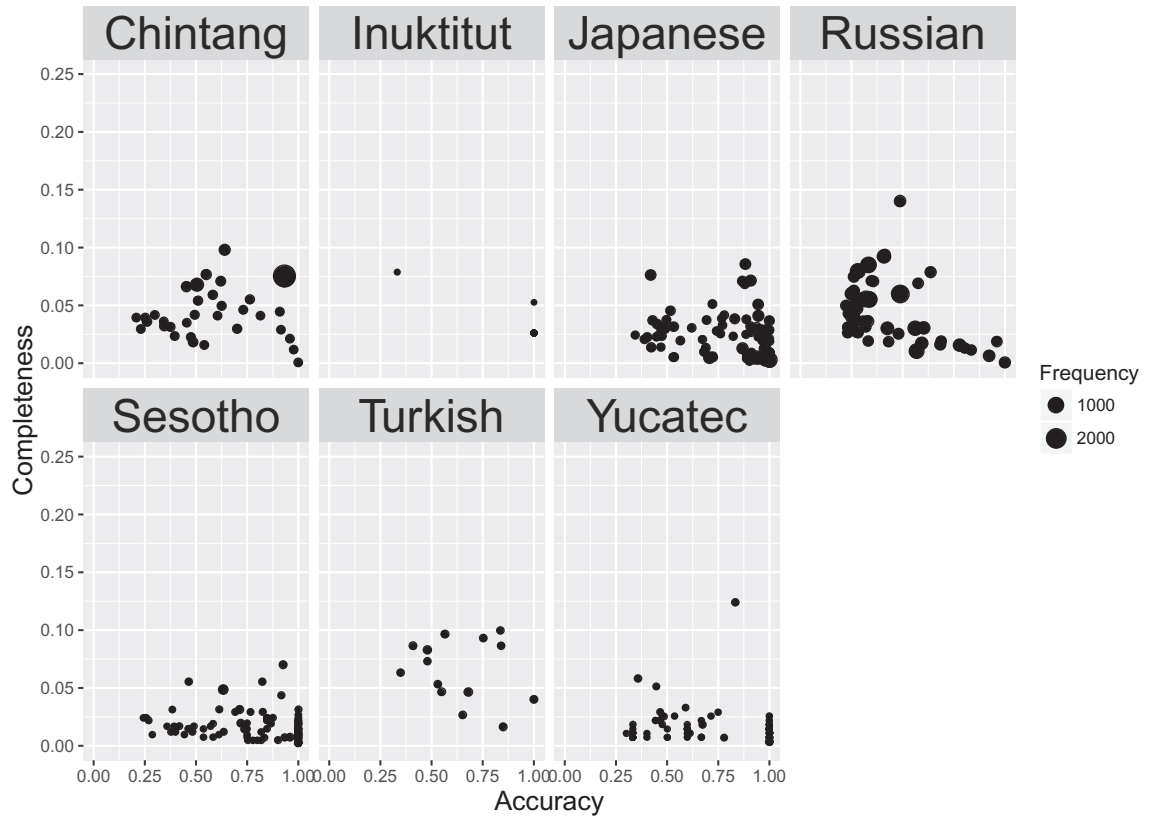

Figure 6: Frequent word frames

680 Figure 7 shows the accuracy and complete of frequent morpheme frames. Again at the  
 681 level of morpheme frames, there is a clear pattern for frame-based categories to cluster towards  
 682 higher accuracy scores and completeness scores range more than in word frames.

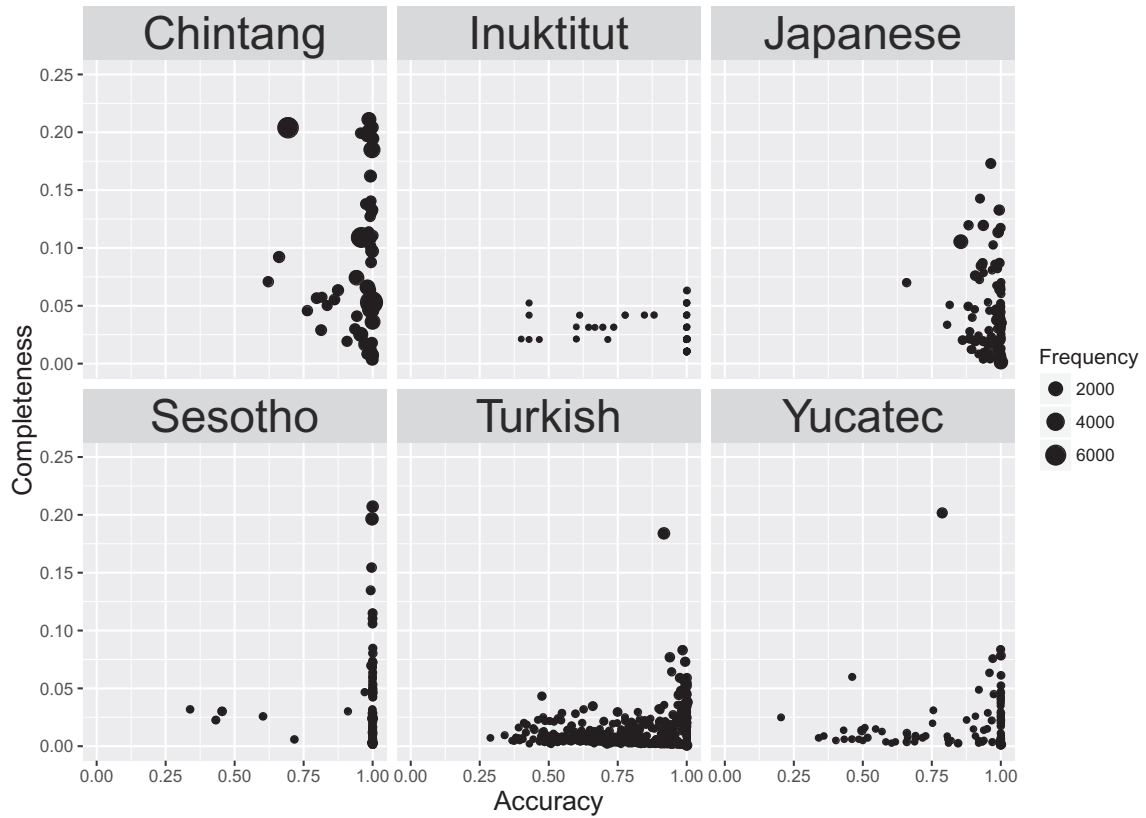

Figure 7: Frequent morpheme frames



683 **5.5 Global accuracy and global completeness**

684 Figure 9 shows global accuracy and completeness of all parts-of-speech at the morpheme level.

685 There is no discernible pattern apart from the categories noun and verb.

686 Figure 10 plots global accuracy and completeness for nouns and verbs at the word level.

687 Neither is particularly accurate or complete. Lastly, Figure 11 shows global accuracy and com-

688 pleteness for all parts-of-speech at the word level. Again, no discernible patterns appear.

689 Figure 8 shows global accuracy and completeness scores for nouns and verbs at the mor-  
 690 pheme level. In nearly all cases both noun and verb frames are extremely accurate and verbs  
 691 across the languages are more complete.

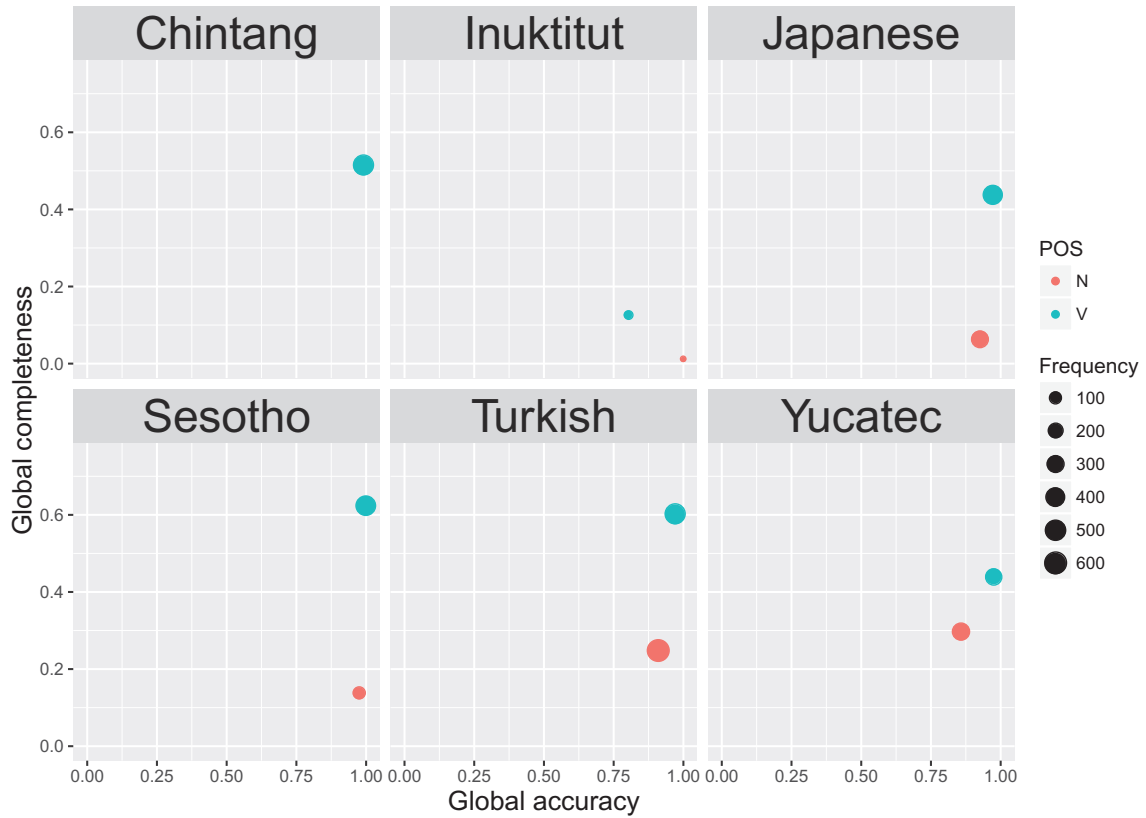

Figure 8: Nouns and verbs by morpheme frames

692 Figure 9 shows global accuracy and completeness for all parts-of-speech at the morpheme  
 693 level. Except for nouns and verbs, there is no discernible pattern.

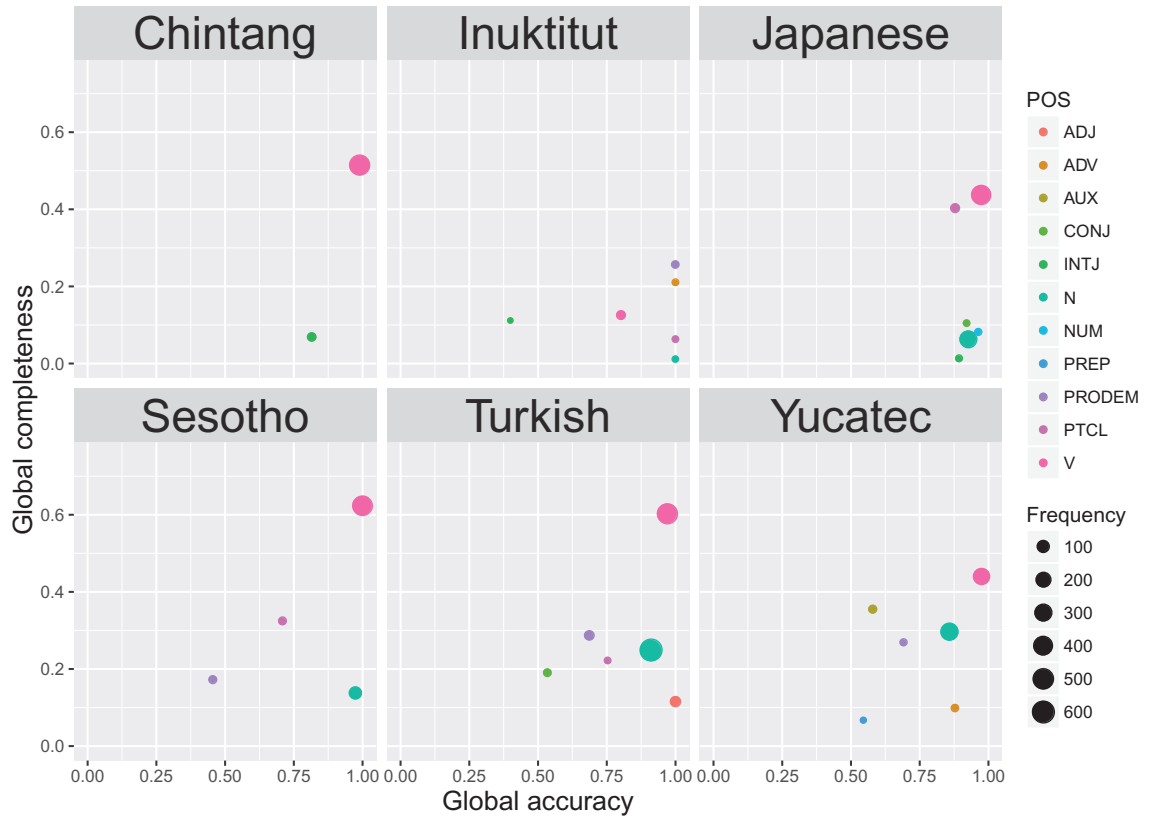

Figure 9: POS categories in morpheme frames

694 Figure 10 shows global accuracy and completeness scores for noun and verb word frames.  
 695 There is no discernible pattern and neither is particularly accurate, except perhaps Japanese,  
 696 which also happens to be the phonologically most impoverished language in our sample.

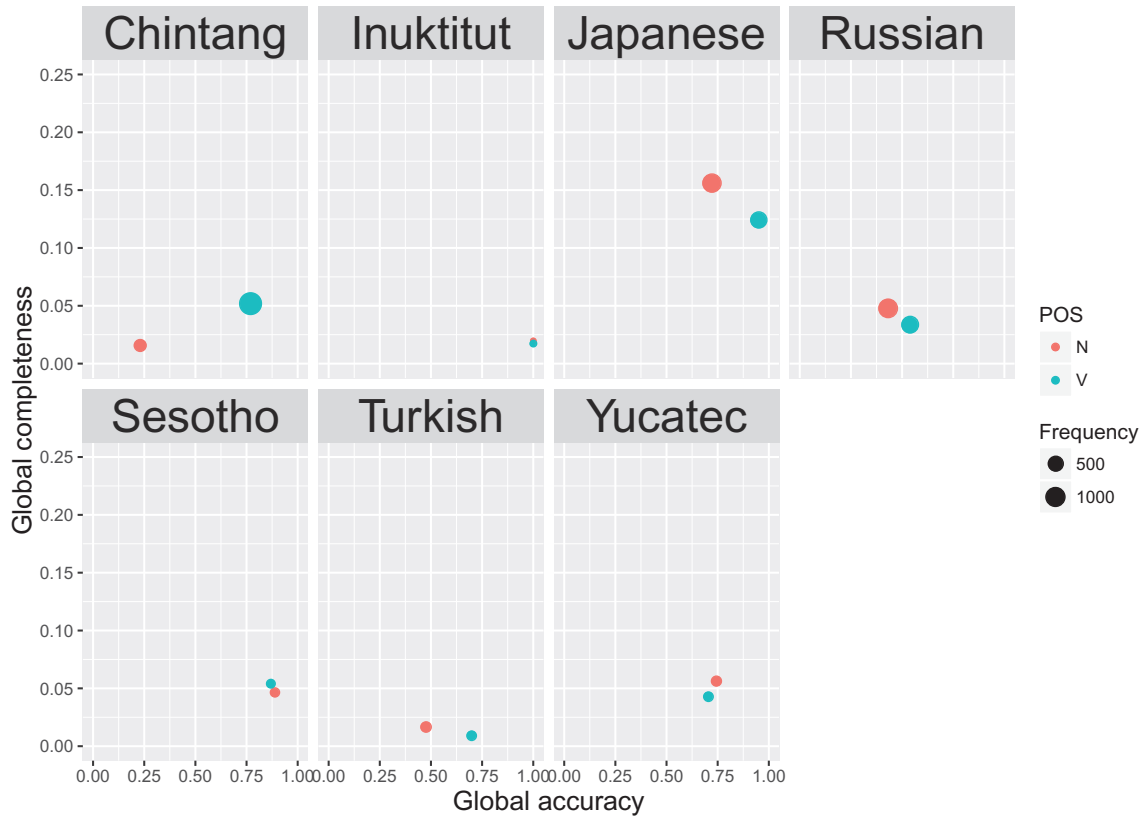

Figure 10: Nouns and verbs by word frames

697 Figure 11 shows global accuracy and completeness scores for parts-of-speech in word level  
 698 frames (relative frequency threshold). Parts-of-speech frames classified by modal categories  
 699 are similar to those with high precision, i.e. Inuktitut, Japanese, Sesotho and Yucatec. Frequent  
 700 frames are most accurate and frequent in Japanese, which may be expected because its phonol-  
 701 ogy contains few phonemes and syllable types (at least much less than the rest of the languages  
 702 in this language sample).

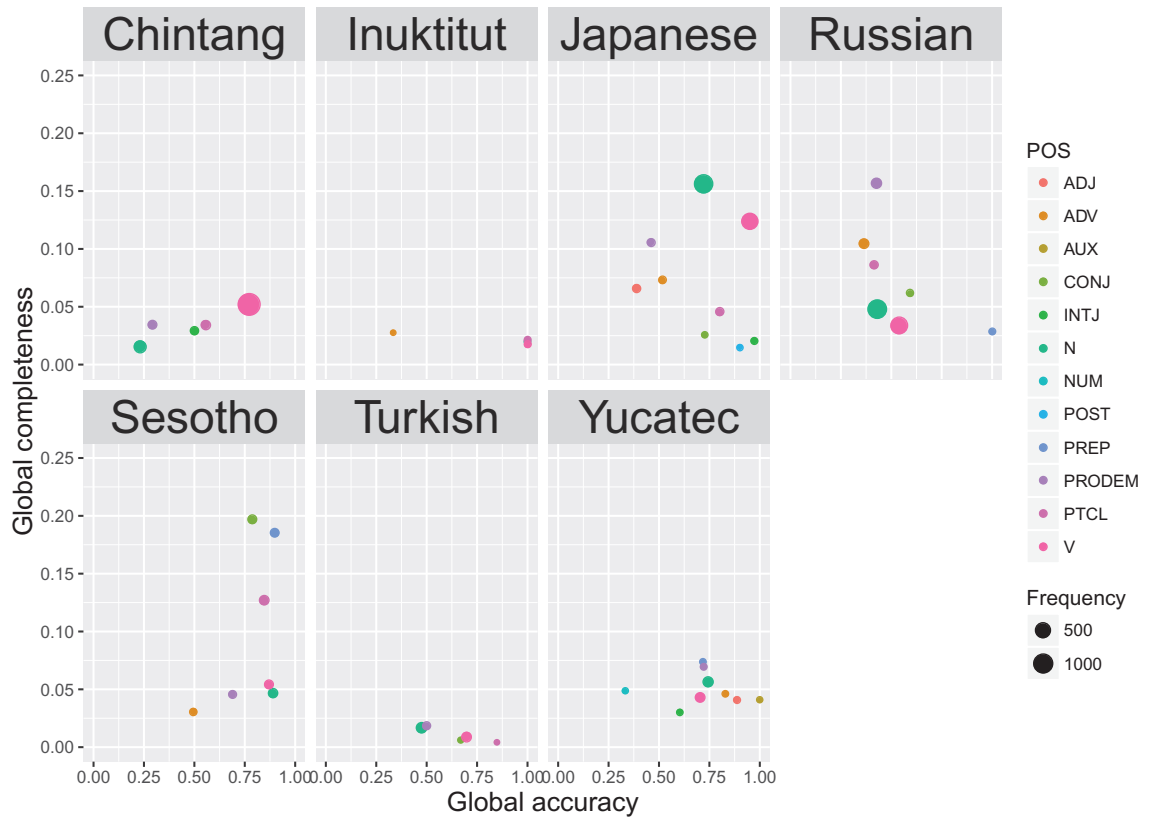

Figure 11: POS categories in word frames

703 Tables 15 and 16 provide the raw global accuracy and completeness scores per grammatical  
704 category in each language in our sample.

|    | Corpus    | POS    | Accuracy | Completeness | Frames |
|----|-----------|--------|----------|--------------|--------|
| 1  | Japanese  | ADJ    | 0.39     | 0.07         | 41     |
| 2  | Yucatec   | ADJ    | 0.89     | 0.04         | 13     |
| 3  | Inuktitut | ADV    | 0.33     | 0.03         | 2      |
| 4  | Japanese  | ADV    | 0.52     | 0.07         | 26     |
| 5  | Russian   | ADV    | 0.36     | 0.10         | 98     |
| 6  | Sesotho   | ADV    | 0.50     | 0.03         | 21     |
| 7  | Yucatec   | ADV    | 0.83     | 0.05         | 8      |
| 8  | Yucatec   | AUX    | 1.00     | 0.04         | 5      |
| 9  | Japanese  | CONJ   | 0.73     | 0.03         | 7      |
| 10 | Russian   | CONJ   | 0.59     | 0.06         | 17     |
| 11 | Sesotho   | CONJ   | 0.79     | 0.20         | 62     |
| 12 | Turkish   | CONJ   | 0.67     | 0.01         | 4      |
| 13 | Chintang  | INTJ   | 0.50     | 0.03         | 45     |
| 14 | Japanese  | INTJ   | 0.97     | 0.02         | 14     |
| 15 | Yucatec   | INTJ   | 0.60     | 0.03         | 7      |
| 16 | Chintang  | N      | 0.23     | 0.02         | 234    |
| 17 | Inuktitut | N      | 1.00     | 0.02         | 6      |
| 18 | Japanese  | N      | 0.72     | 0.16         | 893    |
| 19 | Russian   | N      | 0.43     | 0.05         | 937    |
| 20 | Sesotho   | N      | 0.89     | 0.05         | 81     |
| 21 | Turkish   | N      | 0.48     | 0.02         | 139    |
| 22 | Yucatec   | N      | 0.75     | 0.06         | 120    |
| 23 | Yucatec   | NUM    | 0.33     | 0.05         | 5      |
| 24 | Japanese  | POST   | 0.90     | 0.01         | 6      |
| 25 | Russian   | PREP   | 1.00     | 0.03         | 11     |
| 26 | Sesotho   | PREP   | 0.90     | 0.19         | 59     |
| 27 | Yucatec   | PREP   | 0.72     | 0.07         | 8      |
| 28 | Chintang  | PRODEM | 0.29     | 0.03         | 61     |
| 29 | Inuktitut | PRODEM | 1.00     | 0.02         | 6      |
| 30 | Japanese  | PRODEM | 0.46     | 0.11         | 35     |
| 31 | Russian   | PRODEM | 0.43     | 0.16         | 124    |
| 32 | Sesotho   | PRODEM | 0.69     | 0.05         | 33     |
| 33 | Turkish   | PRODEM | 0.50     | 0.02         | 37     |
| 34 | Yucatec   | PRODEM | 0.72     | 0.07         | 11     |
| 35 | Chintang  | PTCL   | 0.56     | 0.03         | 81     |
| 36 | Inuktitut | PTCL   | 1.00     | 0.02         | 11     |
| 37 | Japanese  | PTCL   | 0.80     | 0.05         | 41     |
| 38 | Russian   | PTCL   | 0.41     | 0.09         | 44     |
| 39 | Sesotho   | PTCL   | 0.85     | 0.13         | 91     |
| 40 | Turkish   | PTCL   | 0.85     | 0.00         | 2      |
| 41 | Chintang  | V      | 0.77     | 0.05         | 1447   |
| 42 | Inuktitut | V      | 1.00     | 0.02         | 13     |
| 43 | Japanese  | V      | 0.95     | 0.12         | 628    |
| 44 | Russian   | V      | 0.54     | 0.03         | 690    |
| 45 | Sesotho   | V      | 0.87     | 0.05         | 62     |
| 46 | Turkish   | V      | 0.70     | 0.01         | 95     |
| 47 | Yucatec   | V      | 0.70     | 0.04         | 96     |

Table 15: Global accuracy and completeness of word frames

|    | Corpus    | POS    | Accuracy | Completeness | Frames |
|----|-----------|--------|----------|--------------|--------|
| 1  | Turkish   | ADJ    | 1.00     | 0.12         | 51     |
| 2  | Inuktitut | ADV    | 1.00     | 0.21         | 4      |
| 3  | Yucatec   | ADV    | 0.88     | 0.10         | 9      |
| 4  | Yucatec   | AUX    | 0.58     | 0.36         | 16     |
| 5  | Japanese  | CONJ   | 0.92     | 0.11         | 4      |
| 6  | Turkish   | CONJ   | 0.53     | 0.19         | 12     |
| 7  | Chintang  | INTJ   | 0.82     | 0.07         | 22     |
| 8  | Inuktitut | INTJ   | 0.40     | 0.11         | 1      |
| 9  | Japanese  | INTJ   | 0.89     | 0.01         | 5      |
| 10 | Inuktitut | N      | 1.00     | 0.01         | 3      |
| 11 | Japanese  | N      | 0.93     | 0.06         | 291    |
| 12 | Sesotho   | N      | 0.97     | 0.14         | 105    |
| 13 | Turkish   | N      | 0.91     | 0.25         | 601    |
| 14 | Yucatec   | N      | 0.86     | 0.30         | 312    |
| 15 | Japanese  | NUM    | 0.96     | 0.08         | 6      |
| 16 | Yucatec   | PREP   | 0.55     | 0.07         | 2      |
| 17 | Inuktitut | PRODEM | 1.00     | 0.26         | 10     |
| 18 | Sesotho   | PRODEM | 0.45     | 0.17         | 14     |
| 19 | Turkish   | PRODEM | 0.69     | 0.29         | 38     |
| 20 | Yucatec   | PRODEM | 0.69     | 0.27         | 7      |
| 21 | Inuktitut | PTCL   | 1.00     | 0.06         | 4      |
| 22 | Japanese  | PTCL   | 0.88     | 0.40         | 27     |
| 23 | Sesotho   | PTCL   | 0.71     | 0.33         | 13     |
| 24 | Turkish   | PTCL   | 0.75     | 0.22         | 4      |
| 25 | Chintang  | V      | 0.99     | 0.51         | 479    |
| 26 | Inuktitut | V      | 0.80     | 0.13         | 26     |
| 27 | Japanese  | V      | 0.97     | 0.44         | 422    |
| 28 | Sesotho   | V      | 1.00     | 0.62         | 448    |
| 29 | Turkish   | V      | 0.97     | 0.60         | 479    |
| 30 | Yucatec   | V      | 0.98     | 0.44         | 262    |

Table 16: Global accuracy and completeness of morpheme frames



705 **5.6 Utterance boundaries**

706 Utterance boundaries are a salient feature in the input to the language learner. Figures 12 and  
707 13 show the frequency of parts-of-speech in utterance initial and final positions in the seven  
708 languages in our sample. The typological features of these languages differ and they do not  
709 necessarily correlate with frequency of part-of-speech, e.g. word order (see Table 5 in the main  
710 text), which raises the question: what roles do frequency and position salience play in language  
711 acquisition? Consider the study by Longobardi et al. (2015), who show that early vocabulary  
712 development of nouns by Italian-speaking children is facilitated by the mother's use of nouns  
713 in utterance final position – even as verbs are more frequent in their child-directed speech.

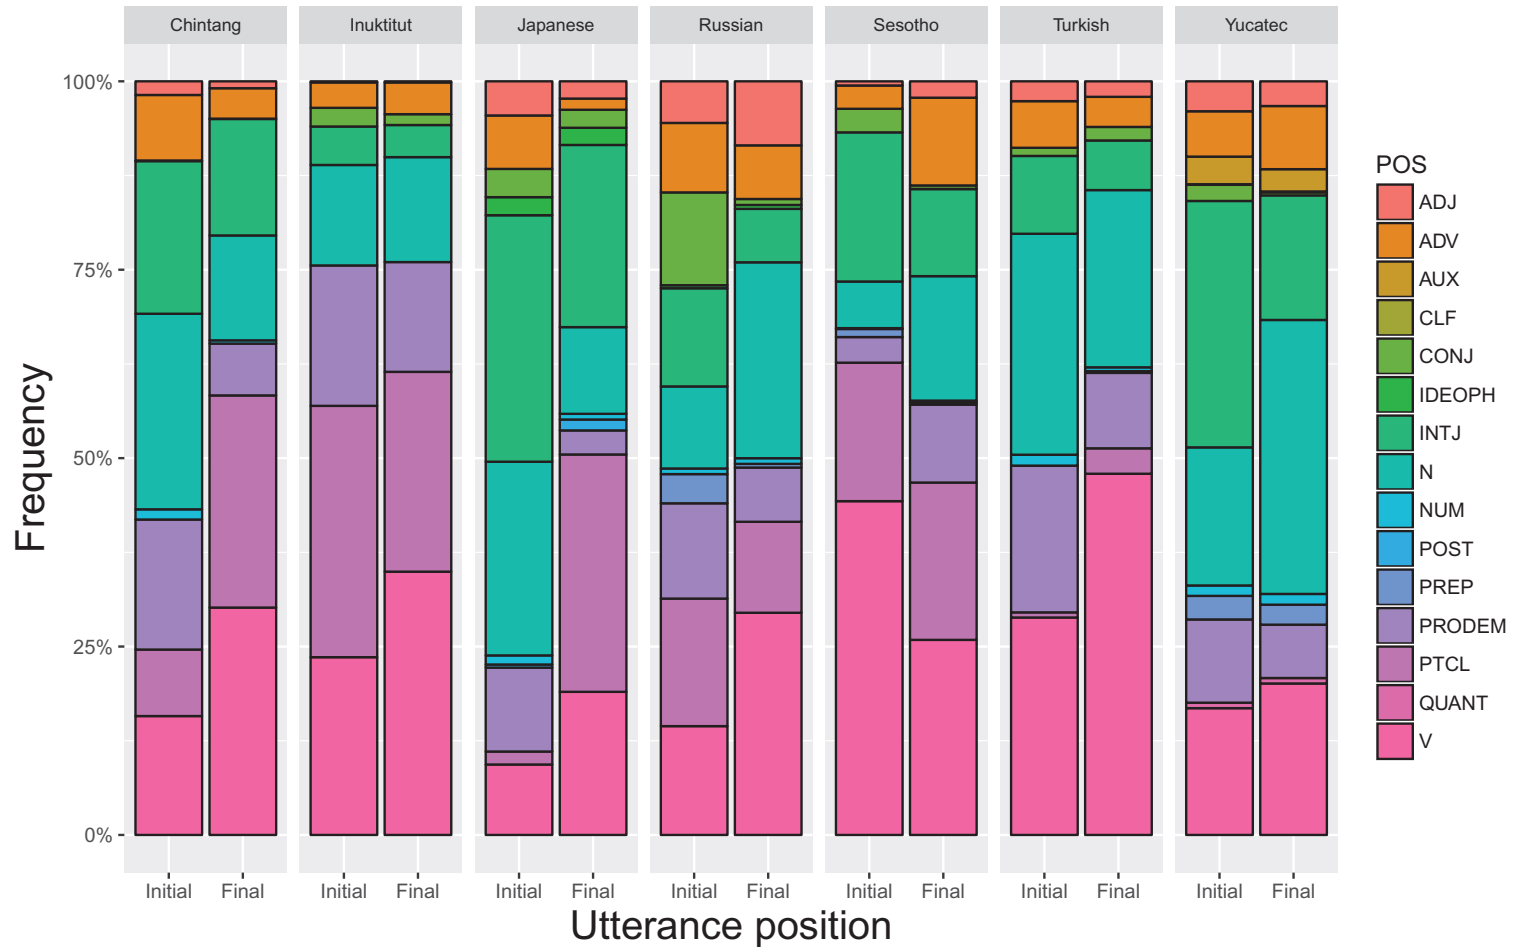

Figure 12: Utterance boundaries: all parts-of-speech

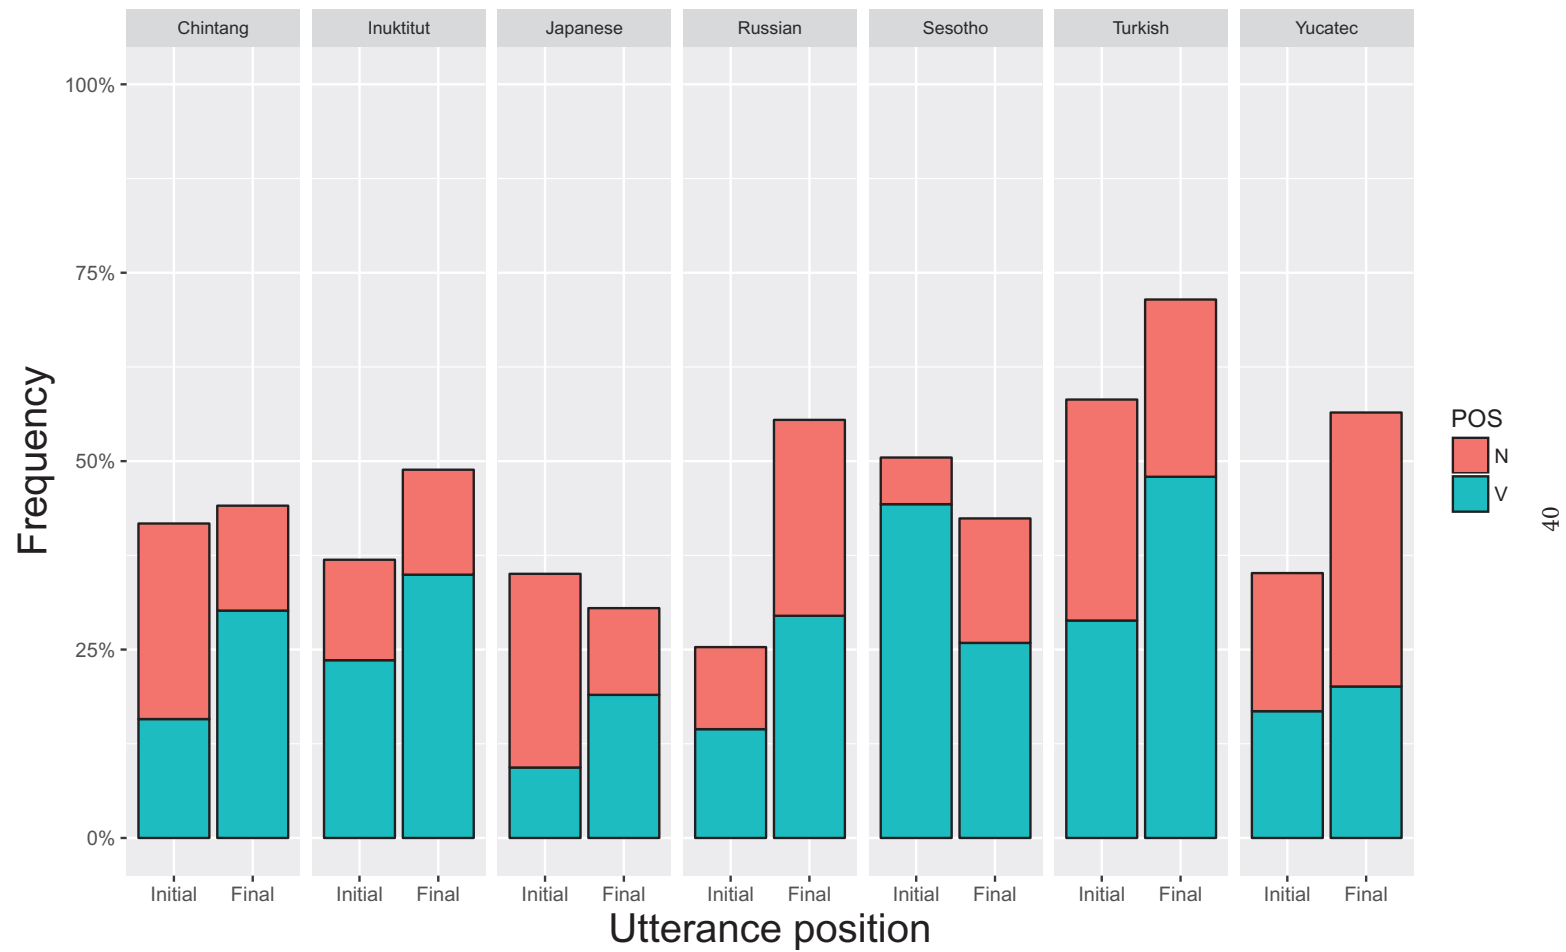

Figure 13: Utterance boundaries: nouns and verbs
